# Supplementary material for: Modelling organic aerosol concentrations and properties during ChArMEx summer campaigns of 2012 and 2013 in the western Mediterranean region
Source: Copernicus journal article supplement (doi:10.5194/acp-2017-312), 2017-05-29
Supplement: Supplementary file [file acp-2017-312-AC3-supplement.pdf]

# Interactive comment on “Modelling organic aerosol concentrations and properties during ChArMEx summer campaigns of 2012 and 2013 in the western Mediterranean region” by Mounir Chrit et al.

## Anonymous Referee #3

Chrit et al. have performed simulations using an air quality model and compared predictions of organic aerosol mass and composition to measurements at a remote site in the Mediterranean Sea. They found that model updates based on the inclusion of new secondary organic aerosol formation pathways improved the model-measurement comparison. Overall the manuscript is well motivated, researched, and discussed. I recommend publication after the authors have had an opportunity to respond to my comments and considered my suggestions.

1. Page 1, line 5: Consider using the noun form: hydrophilicity  
“oxidation state and hydrophilic” is replaced in the revised version by “oxidation state and hydrophilicity”

2. Page 1, line 15: ‘percent’ not ‘percents’.  
“Percents” is replaced in the revised paper by “Percent”.

3. Page 2, lines 1-10: References are dated. Consider newer references.  
Jimenez et al., 2009, Lin et al., 2014 and Tuet et al., 2017 are added in the revised version.

4. Page 2, lines 8-9: Rephrase.  
In the revised version, we replaced the sentence “Considering health effects, oxidative stress, which is induced by the generation of reactive oxygen species (ROS), is suggested as one pathway of OA toxicity.” by “In terms of health effects, OA toxicity is linked to the oxidative stress which is induced by the ROS (Reactive Oxygen Species)”.

5. Page 2, lines 13: Intermediate-volatility organic compounds are a separate precursor category. Add discussion in the introduction. A re  
The sentences “OA are classified either as primary (POA) or as secondary aerosols (SOA). POA are directly emitted in the atmosphere, whereas SOA are produced through chemical oxidation of volatile organic compounds (VOCs) and secondary semi-volatile organic compounds (SVOCs). SOA are often semi volatile, i.e. they partition between the gas and particle phases.” are replaced by “OA are usually classified either as primary (POA) or as secondary aerosols (SOA). POA are directly emitted in the atmosphere, often as intermediate/semi-volatile organic compounds (I/S-VOCs), which partition between the gas and the particle phases (Robinson et al., 2007). The gas-phase I/S-VOC are missing from emission inventories (Couvidat et al. 2012, Kim et al. 2016). SOA are produced through chemical oxidation of volatile organic compounds (VOCs) and I/S-VOCs, and condensation of I/S-VOCs.

6. Page 2, lines 16-22: It would be helpful to be more quantitative when citing earlier work. For example, what fraction of the organic aerosol that El Haddad et al. (2011, 2013) measured was biogenic in nature?

The sentence “El Haddad et al. (2011, 2013) attributed most of the organic carbon (OC) mass to biogenic secondary organic carbon (BSOC), and to monoterpene oxidation products.” is replaced by “El Haddad et al. (2011, 2013) attributed 80% of the organic aerosol mass to biogenic secondary organic aerosols (BSOA), and they attributed near 40% of the BSOA to monoterpene oxidation products.”

7. Page 2, lines 17-19: Hayes et al. (2013, 2015) argue that the biogenic SOA found in Los Angeles was produced near the source and then transported into the city. Suggest citing and reconciling with Hayes work.

A reference to the work of Hayes et al. (2015) is added in the revised paper. Hayes et al. (2013, 2015) characterized the organic aerosol composition and sources in Pasadena in California during the 2010 CalNex campaign and found a substantial contribution from regional biogenic SOA. Biogenic emissions are transported and age during transport, for example during transport over the Central Valley (where there are anthropogenic emissions) in the case of Pasadena.

A sentence is added to the manuscript as followed to cite the work of Hayes et al. (2015) “A large fraction of emitted VOCs is biogenic, especially in the western Mediterranean in summer, when solar radiation is high. Biogenic emissions may age and form SOA as they are transported through different environments (Hayes et al., 2015).”

8. Page 2, line 20, Page 9, line23 (and elsewhere too): ‘Fossil’ and not ‘fossile’.  
“Fossile” is replaced by “fossil” throughout the revised paper.

9. Page 2, line 19: Was Minguillon a measurement or modeling study?

Minguillon et al. (2016) is an experimental study carried out in Barcelona in summer 2013. For clarity, the sentence “Similar results were obtained in a campaign in the Barcelona region (Spain), where Minguillón et al. (2011) have found a prevalence of non-fossile organic aerosol sources in remote and urban environments, and a clear evidence of biogenic VOC oxidation products and biogenic SOA formation under anthropogenic stressors (Minguillón et al., 2016).” is replaced by “Similar results were obtained through measurement campaigns in the Barcelona region (Spain), where Minguillón et al. (2011, 2016) have found a prevalence of non-fossile organic aerosol sources in remote and urban environments, and a clear evidence of biogenic VOC oxidation products and biogenic SOA formation under anthropogenic stressors.”

10. Page 3, line 16: Incomplete sentence: ‘monoterpenes oxidation products SOA over the U.S.’.

In the revised version, “organic nitrate accounts for more than a half of the monoterpene oxidation products SOA over the U.S.” is replaced by “organic nitrate accounts for more than a half of the monoterpene oxidation products in the particle phase over the U.S.”

11. Page 4, Section 2.1: Can you briefly summarize the existing SOA precursors, species, and processes in the model and discuss how those earlier processes do not overlap with the updates made in this work?

In section 2.1 of the revised paper, a brief description of the existing SOA anthropogenic precursors, their aging processes and products is added.

“As detailed in Couvidat et al. (2012), I/S-VOC emissions are emitted in three volatility classes (characterized by their saturation concentrations  $c^*$ :  $\log(c^*) = -0.04, 1.93, 3.5$ ). Their ageing is represented through a single oxidation step, without  $\text{NO}_x$ -dependence, to produce species of lower volatilities ( $\log(c^*) = -2.4, -0.064, 1.5$ ) but higher molecular weights. For aromatic compounds, toluene and xylene are used as surrogate precursors. The precursors react with OH to form radicals that may then react differently under low- $\text{NO}_x$  and high- $\text{NO}_x$  conditions. Under low- $\text{NO}_x$  conditions, the surrogate is not identified, but it is supposed to be hydrophobic. Under high- $\text{NO}_x$  conditions, the surrogate formed are two benzoic acids (methyl nitro benzoic acid and methyl hydroxyl benzoic acid).

12. Page 5, line 26-28: Am I correct that these oxygenated peroxy radicals can be formed only in the absence of NO? If yes, specify.

Peroxy radicals  $\text{RO}_2$  are preferentially formed in low- $\text{NO}_x$  conditions, where  $\text{O}_3$  concentration is high. However, depending on the  $\text{NO}_x$  concentrations, they may still form in high- $\text{NO}_x$  conditions, and then react with NO to form organic nitrate (reaction (A9) of Appendix A). Organic nitrate from ELVOCs were not considered here because their concentrations were negligible.

13. How is gas/particle partitioning of the explicit oxidation products modeled? If only briefly, please summarize the partitioning model and assumptions.

A brief description of the gas/particle partitioning of the surrogates is added in section 2.1 of the revised paper. The sentence “For organic aerosols, the partitioning is computed using SOAP (Couvidat and Sartelet, 2015), and bulk equilibrium is also assumed for SOA partitioning.” is replaced by “For organic aerosols, the gas/phase partitioning of the surrogates is computed using SOAP (Couvidat and Sartelet, 2015), and bulk equilibrium is also assumed for SOA partitioning. The gas/phase partitioning of hydrophobic surrogates is modelled following Pankow (1994), with absorption by the organic phase (hydrophobic surrogates). The gas/phase partitioning of hydrophilic surrogates is computed using the Henry’s law modified to extrapolate infinite dilution conditions to all conditions using an aqueous-phase partitioning coefficient, with absorption by the aqueous phase (hydrophilic organics, inorganics and water). Activity coefficients are computed with the thermodynamic model UNIFAC (UNIversal Functional group, Fredenslund et al., 1975).”

14. Page 8, line 2: I did not understand the meaning of ‘nested rep.’ in parentheses.

In the revised version “(nested rep.)” is replaced by “nested respectively” and “(6 June and 8 July 2012 resp.)” by “(6 June and 8 July 2012 respectively)”.

15. Page 8, line 14: ‘split’ not ‘splitted’.

“splitted” is replaced by “split” in the revised version.

16. Page 8, line 18-20: The SVOC/POA ratios might be a little too high. See work of May et al. (2014a,b) for estimates on SVOC/POA ratios. Also, is there a reason why IVOC emissions were not considered? See work of Jathar et al. (2014) and Zhao et al. (2015, 2106) for estimates of IVOCs from combustion sources as a function of VOC emissions.

IVOCs are considered in our emissions and are included as part of SVOCs. Moreover, in this paper, the I/S-VOC/POA ratio corresponds to the ratio of (gas+ particle phases)/(particle phase). This ratio equals to 1.5 if only the gas-phase of I/S-VOC is considered in the ratio I/S-VOC/POA. The ratio equals 2.5 if both gas and particle phases of I/S-VOC are considered in the ratio I/S-VOC/POA. The choice made is based on the study of Kim et al 2006 who evaluated experimentally the ratio for exhaust emissions from gasoline and diesel vehicles, and from the air-quality simulations of Zhu et al. (2016) over Greater Paris.

For clarity, the sentences “POA are assumed to be the particle phase of semi-volatile anthropogenic organic emissions (SVOC). Total SVOC emissions are estimated as detailed in Couvidat et al. (2012), by multiplying POA by a fixed value, and by assigning them to species of different volatilities. In this study, the ratio SVOC/POA is set to 2.5 (Kim et al., 2016; Zhu et al., 2016). Setting the ratio SVOC/POA to 1 has little impact on the organic concentrations” are replaced by “POA are assumed to be the particle phase of I/S-VOC. Total I/S-VOC emissions (gas and particle phases) are estimated as detailed in Couvidat et al. (2012), by multiplying POA by a fixed value, and by assigning them to species of different volatilities. In this study, the ratio I/S-VOC/POA is set to 2.5 (Kim et al., 2016; Zhu et al., 2016). Setting the ratio I/S-VOC/POA to 1 has little impact on the organic concentrations, as shown in Figure 2.”

17. Page 8, lines 25-28: What is the organic fraction in sea salt emissions?

The sentence “The organic fraction of sea-salt emissions is not taken into account in the simulation presented here. However, it is estimated in section 5, where the contribution of organic sea-salt emissions to organic concentrations is assessed.” is added after line 28 of page 8 to the revised version of the paper.

18. Page 10: How does the model perform in predicting the diurnal variations in OA?

The figure below illustrates the model-to-measurement comparison of the diurnal concentrations of OM<sub>1</sub> concentrations. There is no clear diurnal variation in the measurements, probably because the organic compounds are very oxidized and of low volatility. The model slightly underestimates the

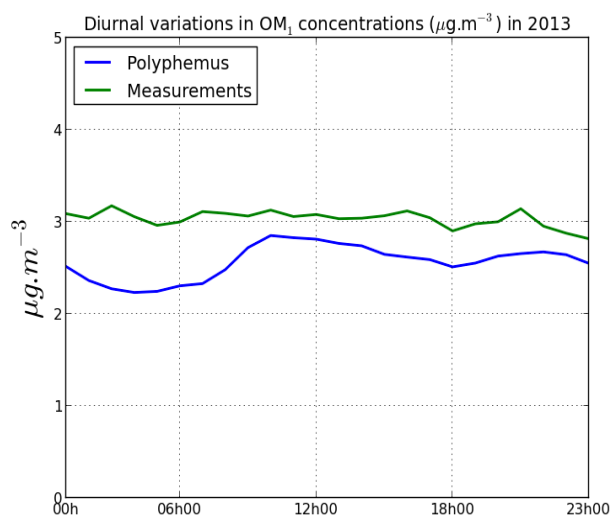

19. Figure 2: The composition in Figure 3 tells me that the model updates must also have increased mass concentrations and resulted in better comparison in Figure 2. This fact is missing in Section 4.1. Please state the importance of this either in Section 4.1 or in the conclusions in Section 6. This remark is added in section 6 (conclusion) of the revised paper. “During the summer 2013, the added surrogates contribute to 15% of the OM<sub>1</sub> mass for ELVOC, 20% for organic nitrate from monoterpene oxydation and 0.2% for MBTCA. In agreement with <sup>14</sup>C measurements, most of the organic aerosol is from non-fossil (biogenic) origin.”

20. Section 4.2: Has the model been evaluated for other pollutants? For example, black carbon, carbon monoxide, ozone, NO.

The model was also evaluated for other pollutants, like the concentrations of other particle components and precursors, and ozone. The ozone is slightly overestimated (the measured and simulated means are 51.30 µg/m<sup>3</sup> and 60.69 µg/m<sup>3</sup> respectively). The black carbon in PM<sub>2.5</sub> is also evaluated and found to be overestimated (the measured and simulated means are 0.28 µg/m<sup>3</sup> and 0.56 µg/m<sup>3</sup> respectively).

Another paper about the origins of particles and comparisons to measurements of the concentrations of particle components and precursors is about to be submitted. Therefore, these comparisons are not added to this paper.

21. Page 11, line 20: How low are the sesquiterpene emissions compared to isoprene and monoterpenes? Be quantitative.

In section 3.1.3 of the revised paper, the following sentence is added “... from Nature (MEGAN, Guenther et al (2006)). Over, the Mediterranean domain, during the period of the 2013 summer simulation, the mean emissions of sesquiterpenes, monoterpenes and isoprene are 0.001, 0.019 and 0.024 µg/m<sup>2</sup>/s respectively. Hence, comparing to isoprene and. monoterpene emissions, the sesquiterpene emissions are lower by a factor of 95.8% and 94.7% respectively.”

22. Page 11, line 22: IVOCs are mentioned here but are they actually included since the methods do not talk about them.

As detailed in the previous replies, in the ACPD version of the paper, SVOC emissions referred to both I/S-SVOC. Details on the modelling are added: “As detailed in Couvidat et al. (2012), I/S-VOC emissions are emitted in three volatility classes (characterized by their saturation concentrations c\*: log(c\*) = -0.04, 1.93, 3.5). Their ageing is represented through a single oxidation

23. Figure 3 and 6, left panel: Why is the pie not a circle? Also, consider increasing the font size for readability.

The setting to include the figures in the paper is modified, so that the pie looks like a circle. The font-size in figures 3 and 6 is increased for readability sake.

24. Page 12, line 5: ‘There are a variety. . .’.

“There are variety ...” is modified to “There is a variety ...”

25. Page 12, line 7: ‘ponderating’?

“... ponderating ...” is replaced in the revised paper by “... weighting ...”

26. Figure 4: The legend makes it seem like the model predictions systematically discount (or subtract) the effects of the three updates rather than the opposite that is mentioned in the caption. Replace ‘-’ with ‘+’?

In the legend of figure 4 of the revised paper, the “-” are replaced by “+”.

27. Figure 4: Given that the OM:OC and O:C measurements are not directly measured but rather interpreted from the ACSM data, can the measurements be shown with error bars?

As stated by Crenn et al. (2015) from the intercomparison of 13 Q-ACSMs (including the one used in this study), an important instrument-to-instrument variability is observed in the O/C ratio. This variability currently remains unexplained; it appears to be independent of the organic mass concentrations and could be due to instrument-dependent differences in the vaporization conditions. Because of this instrument-to-instrument variability, and because it is difficult to define a reference instrument which can provide an accurate measurement of the O/C ratio, a correct estimate of our Q-ACSM measurement uncertainty of the O/C ratio remains hard to provide.

However, and further to the discussion provided in the manuscript, an indicative OM/OC ratio can be calculated here from the direct comparison of OM (from Q-ACSM) and OC (from OCEC Sunset field instrument). Comparison was performed during the campaign, for a 3-week period (15/07-05/08/2013), and showed a slope of 2.0 ( $r^2=0.80$ ;  $N = 252$  valid data points).

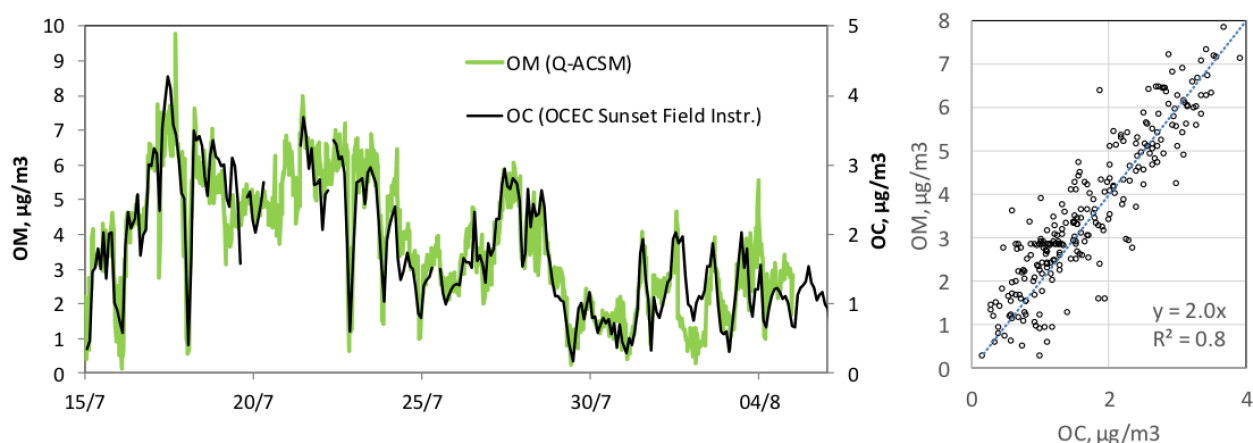

OC measurements were obtained at PM<sub>2.5</sub> instead of PM<sub>1</sub> for OM (Q-ACSM). This may lead to higher OM/OC ratio (in PM<sub>1</sub>). Based on co-located OC size-segregated measurements performed during the campaign by low-pressure 13-stage DEKATI cascade impactor, we have calculated that OC in PM<sub>2.5</sub> was typically 10% higher compared to OC in PM<sub>1</sub> (J. Sciare, personal communication). This would result in an experimentally determined OM/OC ratio of 2.2 which

28. Page 14, lines 5-7: Can the authors describe the mechanism at play here and the correct citation? A brief description of the gas/particle partitioning of the surrogates is added in section 2.1 of the revised paper: “For organic aerosols, the gas/phase partitioning of the surrogates is computed using SOAP (Couvidat and Sartelet, 2015), and bulk equilibrium is also assumed for SOA partitioning. The gas/phase partitioning of hydrophobic surrogates is modelled following Pankow (1994), with absorption by the organic phase (hydrophobic surrogates). The gas/phase partitioning of hydrophylic surrogates is computed using the Henry’s law modified to extrapolate infinite dilution conditions to all conditions using an aqueous-phase partitioning coefficient, with absorption by the aqueous phase (hydrophilic organics, inorganics and water). Activity coefficients are computed with the thermodynamic model UNIFAC (UNIversal Functional group, Fredenslund et al., 1975). Therefore, the concentrations in the aqueous phase increase when the concentrations of inorganics (particularly sulfate) increase.

In section 4.3 of the revised paper, the sentence “Furthermore, a large part of biogenic SOA is hydrophilic and therefore higher condensation of sulfate enhances their partitioning into the particulate phase.” is replaced by “Furthermore, a large part of biogenic SOA is hydrophilic and therefore higher condensation of sulfate enhances their partitioning into the particulate phase, as the mass of the aqueous phase increases through the condensation of sulfate (Couvidat and Sartelet (2015).”

29. Section 4.4 and Page 1, line 11: The claims about improving the hydrophilicity predictions are slightly misleading since what the authors have actually done is improve predictions of mass concentrations of water soluble organic carbon.

Yes, indeed. The improvement concerns the mass concentrations of water-soluble organic carbon. “... oxidation state and hydrophilic properties ...” is replaced by “... oxidation property of organics and the hydrophilic organic carbon...” in the revised version of the paper.

30. Figure 6 does not have a left-right panel but a top-bottom panel. Fix caption.  
The panels in Figure 6 are modified to not be top-bottom but left-right.

31. Figures 7, 8 and 9 could be combined into a single multi-panel figure. Also, consider adding city names to orient the reader not familiar with that part of the world.

Figures 7, 8, and 9 are combined into a multi-panel figure. Besides, the island name (Corsica), the Mediterranean sea, the Adriatic sea, the name of FRANCE and ITALY are added in order to orient the reader who are not familiar with that part of the world.

32. Sensitivity analysis: How sensitive are the model predictions and the findings from this work to the various inputs (reaction rate constants, yields, etc.) listed in the appendix? I would encourage the authors to perform additional simulations to (i) develop lower and upper bounds on their estimates for ELVOCs, organic nitrates, and MBTCA and (ii) develop insight on the most important inputs that would guide future laboratory work.

There are uncertainties in the reactions rate constants and yields of the mechanisms leading to the formation of ELVOCs, organic nitrate and MBTCA. However, those uncertainties are difficult to evaluate.

For the formation of ELVOCs and the autoxidation mechanism added in the model, the reaction rate constants are defined in Ehn et al. (2014). In fact,  $k_1$  of the ozonolysis reaction is suggested by MCM,  $k_{H/O_2}$  is calculated in Ehn et al. (2014) to reproduce the turnover at the same point as in the observations during the chamber experiments. It is not straightforward to determine lower and upper bounds of these reaction rate constants. Concerning the yields of ELVOCs, it is possible to infer a lower and upper bound from the papers of Ehn et al. (2014) and Jokinen et al. (2015), as

| VOCs             | Ehn et al. (2014) | Jokinen et al. (2015) |
|------------------|-------------------|-----------------------|
| $\alpha$ -pinene | 7% $\pm$ 3.5%     | 3.4% $\pm$ 1.7%       |
| Limonene         | 17% $\pm$ 8.5%    | 5.3% $\pm$ 2.6%       |

Details on the ELVOC yield and the choice of the bounds are added in section 2.2. The sentence “ELVOC is assumed to be formed with an average molar yield of 11% following Ehn et al. (2014), although Jokinen et al. (2015) reported lower yields (about 5%).” is replaced by “The ELVOC yield is assumed to be 11%, i.e. close to the average of the yields of  $\alpha$ -pinene and limonene according to Ehn et al. (2014). Jokinen et al. (2015) suggested lower yields (Table 2). In this paper, sensitivity simulations with a lower bound of 3% and an upper bound of 18% are also conducted”.

The following sentences are added in section 4. “Two sensitivity simulations are performed using a lower bound yield (3%) and an upper bound yield (18%). In Appendix D, similarly to what is presented in this section for the reference simulation, the sensitivity simulations are compared to each other and to the measurements in terms of the mass of OM<sub>1</sub>, the organic aerosol composition, the OM:OC and O:C ratios.

In the organic nitrate formation mechanism developed by Pye et al. (2015), the rate constants are from saprc07 (Carter et al. (2010), Hutzell et al. (2012)) except for the reaction with HO<sub>2</sub> which is calculated based on MCM for a species with 10 carbons (Jenkin et al. (1997), Saunders et al. (2003)). The yields of the reactions are taken from SAPRC07 (Carter et al. (2010)). The yields through the TERPNRO<sub>2</sub> + NO and NO<sub>3</sub> pathways were calculated from estimates of the extent to which the radicals decompose to release NO<sub>2</sub> versus retain the nitrate group (Carter et al. (2010)). The yield from the reaction with HO<sub>2</sub> produced 100% hydroperoxide (consistent with MCM, (Jenkin et al. (1997), Saunders et al. (2003)). Therefore, it is not easy to determine lower and upper bounds of the rate constants and yields of the reactions. However, as pointed out to in Pye et al., (2015), there is a critical need for additional laboratory data when it comes to the organic nitrate sources (ozonolysis, photooxidation and chemical pathways that do not contain nitrogen). Besides, structure-dependant and pH-dependant hydrolysis rate constants and the resulting product volatility for a range of organic nitrates from biogenic VOCs oxidation.

The formation of MBTCA is very low here. Therefore, as stated in the conclusion, further sensitivity studies should not focus on determining a single yield for MBTCA, as done here, but a yield for carboxylic acids that may partition to the particle phase.

#### References:

Carter, W. P. L., Development of the SAPRC-07 chemical mechanism. *Atmos. Environ.* 2010, 44(40), 5324-5335.

Carter, W. P. L. Development of the SAPRC-07 Chemical Mechanism and Updated Ozone Reactivity Scales, Final report to the California Air Resources Board Contract No. 03–318. January 27, 2010, [www.cert.ucr.edu/~carter/SAPRC](http://www.cert.ucr.edu/~carter/SAPRC).

Couvidat, F., Debry, É., Sartelet, K., and Seigneur, C.: A hydrophilic/hydrophobic organic (H<sub>2</sub>O) model: Model development, evaluation and sensitivity analysis, *J. Geophys. Res.*, 117, D10 304, doi:10.1029/2011JD017214, 2012

F. Couvidat and K. Sartelet, The Secondary Organic Aerosol Processor (SOAP v1.0) model: a unified model with different ranges of complexity based on the molecular surrogate approach, *Geosci. Model Dev.*, 8, 1111–1138, 2015, doi:10.5194/gmd-8-1111-2015

V. Crenn, J. Sciare, P. L. Croteau, S. Verlhac, R. Fröhlich, C. A. Belis, W. Aas, M. Äijälä, A.

Herrmann, C. Lunder, M. C. Minguillón, G. Mocnik, C. D. O'Dowd, J. Ovadnevaite, J.-E. Petit, E. Petralia, L. Poulain, M. Priestman, V. Riffault, A. Ripoll, R. Sarda-Estève, J. G. Slowik, A. Setyan, A. Wiedensohler, U. Baltensperger, A. S. H. Prévôt, J. T. Jayne, and O. Favez: ACTRIS ACSM intercomparison – Part 1: Reproducibility of concentration and fragment results from 13 individual Quadrupole Aerosol Chemical Speciation Monitors (Q-ACSM) and consistency with co-located instruments, *Atmos. Meas. Tech.*, 8, 5063–5087, doi:10.5194/amt-8-5063-2015, 2015.

Ehn, M., Thornton, J., Kleist, E., Sipilä, M., Junninen, H., Pullinen, I., Springer, M., Rubach, F., Tillmann, R., Lee, B., Lopez-Hilfiker, F., Andres, S., Acir, I., Rissanen, M., Jokinen, T., Schobesberger, S., Kangasluoma, J., Kontkanen, J., Nieminen, T., Kurtén, T., Nielsen, 10 L. B., Jørgensen, S., Kjaergaard, H. G., Canagaratna, M., Dal Maso, M., Berndt, T., Petäjä, T., Wahner, A., Kerminen, V., Kulmala, M., Worsnop, D. R., Wildt, J., and Mentel, T. F.: A large source of low-volatility secondary organic aerosol, *Nature*, 506, 476–479, doi:10.1038/nature13032, 2014.

Fredenslund, Aa., Jones, R. L. and Prausnitz, J. M., Group-Contribution Estimation of Activity Coefficients in Nonideal Liquid Mixtures. *AIChE J.*, 21, 1086-1099 (1975).

Jenkin, M. E.; Saunders, S. M.; Pilling, M. J., The tropospheric degradation of volatile organic compounds: A protocol for mechanism development. *Atmos. Environ.* 1997, 31 (1), 81-104.

Jokinen, T., Berndt, T., Makkonen, R., Kerminen, V., Junninen, H., Paasonen, P., Stratmann, F., Herrmann, H., Guenther, A. B., Worsnop, D. R., Kulmala, M., Ehn, M., and Sipilä, M.: Production of extremely low volatile organic compounds from biogenic emissions: Measured yields and atmospheric implications, *Proc. Nat. Acad. Sci.*, 112, 7123–7128, doi:10.1073/pnas.1423977112, 2015.

Hutzell, W. T.; Luecken, D. J.; Appel, K. W.; Carter, W. P. L., Interpreting predictions from the SAPRC07 mechanism based on regional and continental simulations. *Atmos. Environ.* 2012, 46 (0), 417- 429.

Nieminen, T., Kurtén, T., Nielsen, 10 L. B., Jørgensen, S., Kjaergaard, H. G., Canagaratna, M., Dal Maso, M., Berndt, T., Petäjä, T., Wahner, A., Kerminen, V., Kulmala, M., Worsnop, D. R., Wildt, J., and Mentel, T. F.: A large source of low-volatility secondary organic aerosol, *Nature*, 506, 476–479, doi:10.1038/nature13032, 2014.

Pye, H., Luecken, D. J., Xu, L., Boyd, C., Ng, N., Baker, K., Ayres, B., Bash, J., Baumann, K., Carter, W., Edgerton, E., Fry, J., Hutzell, W., Schwede, D., and Shepson, P.: Modelling the current and the future roles of particulate organic nitrates in the southeastern United States, *Environ. Sci. Technol.*, 49, 14 195–14 203, doi:10.1021/acs.est.5b03738, 2015.

Saunders, S. M.; Jenkin, M. E.; Derwent, R. G.; Pilling, M. J., Protocol for the development of the Master Chemical Mechanism, MCM v3 (Part A): tropospheric degradation of non-aromatic volatile organic compounds. *Atmos. Chem. Phys.* 2003, 3, 161-180.
